# Supplementary material for: Validation of a Digital Headache Calendar at a Tertiary Referral Center
Source: MDPI journal article supplement (doi:10.3390/diagnostics14010021), 2023-12-22
Supplement: s1 [file s1]

Supplementary Figure S1. Diagnostic headache diary

DIAGNOSTIC HEADACHE DIARY

Hovedpineer

Complete the diary every evening. Tick the boxes that fit the questions best. Read the instructions carefully.

Name: Birth Date:

From date: - 20 to date: - 20

| 1.  | Year:                                                                                                                        | Date:                                                                               | M /                                                                                                          | T /                                                                                                          | W /                                                                                                          | T /                                                                                                          | F /                                                                                                          | S /                                                                                                          | S /                                                                                                          |
|-----|------------------------------------------------------------------------------------------------------------------------------|-------------------------------------------------------------------------------------|--------------------------------------------------------------------------------------------------------------|--------------------------------------------------------------------------------------------------------------|--------------------------------------------------------------------------------------------------------------|--------------------------------------------------------------------------------------------------------------|--------------------------------------------------------------------------------------------------------------|--------------------------------------------------------------------------------------------------------------|--------------------------------------------------------------------------------------------------------------|
| 2.  | Did you have a headache today                                                                                                | no:<br>yes:<br>When did the headache begin?<br>hour:                                |                                                                                                              |                                                                                                              |                                                                                                              |                                                                                                              |                                                                                                              |                                                                                                              |                                                                                                              |
| 3.  | When did the headache disappear?                                                                                             | hour:                                                                               |                                                                                                              |                                                                                                              |                                                                                                              |                                                                                                              |                                                                                                              |                                                                                                              |                                                                                                              |
| 4.  | Just before the headache began, was there any                                                                                | visual disturbance:<br>sensory disturbance:<br>difficulty speaking:                 | <input type="checkbox"/><br><input type="checkbox"/><br><input type="checkbox"/>                             |
| 5.  | Was the headache                                                                                                             | on both sides:<br>right sided:<br>left sided:                                       | <input type="checkbox"/><br><input type="checkbox"/><br><input type="checkbox"/>                             |
| 6.  | Was the headache                                                                                                             | pressing/tightening:<br>pulsating/throbbing:                                        | <input type="checkbox"/><br><input type="checkbox"/>                                                         |
| 7.  | Was the headache - on average (see * below)                                                                                  | mild:<br>moderate:<br>severe:                                                       | <input type="checkbox"/><br><input type="checkbox"/><br><input type="checkbox"/>                             |
| 8.  | Was the headache aggravated by physical activity, e.g. walking on stairs?                                                    | no:<br>yes:                                                                         | <input type="checkbox"/><br><input type="checkbox"/>                                                         |
| 9.  | Did you suffer from nausea?                                                                                                  | no:<br>mild:<br>moderate:<br>severe:                                                | <input type="checkbox"/><br><input type="checkbox"/><br><input type="checkbox"/><br><input type="checkbox"/> |
| 10. | Were you bothered by light?                                                                                                  | no:<br>yes:                                                                         | <input type="checkbox"/><br><input type="checkbox"/>                                                         |
| 11. | Were you bothered by sounds?                                                                                                 | no:<br>yes:                                                                         | <input type="checkbox"/><br><input type="checkbox"/>                                                         |
| 12. | Did anything trigger this headache attack                                                                                    | if yes, please specify:                                                             |                                                                                                              |                                                                                                              |                                                                                                              |                                                                                                              |                                                                                                              |                                                                                                              |                                                                                                              |
| 13. | Did you take any medicine for headache or for any other pain? (for each, please write name, amount and the time you took it) | name:<br>amount:<br>time:<br>name:<br>amount:<br>time:<br>name:<br>amount:<br>time: |                                                                                                              |                                                                                                              |                                                                                                              |                                                                                                              |                                                                                                              |                                                                                                              |                                                                                                              |

\*)

Mild = does not inhibit work or other activities.  
Moderate = inhibits, but does not prohibit work or other activities.  
Severe = prohibits work or other activities.

Supplementary Figure S2. Information box regarding Tension-type Headache Information box regarding Migraine

With tension-type headache at least 2/4 of the following must be fulfilled:

- Moderate/mild pain intensity
- Pain located on both side of the head.
- The pain is pressing/tightening.
- Not aggravated by routine physical activity

Besides there can be sound- or light sensitivity, but no nausea.

With migraine at least 2/4 of the following must be fulfilled:

- Moderate/severe pain intensity
- Pain is most prominent on one side of the head.
- The pain is pulsatile/pounding.
- Aggravation by routine physical activity

Besides there can be at least 1/2:

- Nausea
- Sound-or light sensitivity
